# Supplementary material for: Global analysis of the differentially expressed miRNAs of prostate cancer in Chinese patients
Source: PubMed Central journal article supplement (PMC4008360; doi:10.1186/1471-2164-14-757), 2013-11-05
Supplement: 1471-2164-14-757-S1.pdf [file 1471-2164-14-757-S1.pdf]

**Table S1 Clinical features of all patients**

| <b>Sample Type &amp; Clinical Features</b> | <b>Experiment Type (cases)</b> |                   |                      |
|--------------------------------------------|--------------------------------|-------------------|----------------------|
|                                            | <b>Microarray</b>              | <b>QRT-PCR</b>    | <b>ISH</b>           |
| <b>Prostate Cancer</b>                     | 5                              | 20                | 104                  |
| <b>Mean age (range, years)</b>             | 69.2±10.8 (54-80)              | 73.6±11.5 (54-85) | 59.80 ± 7.07 (43-86) |
| < 60                                       | 0                              | 4                 | 67                   |
| ≥60                                        | 4                              | 16                | 37                   |
| <b>Serum PSA levels(ng/ml)</b>             |                                |                   | #                    |
| <10                                        | 1                              | 5                 | 21                   |
| ≥10                                        | 3                              | 15                | 82                   |
| <b>Gleason Score</b>                       |                                |                   | #                    |
| <8                                         | 2                              | 12                | 81                   |
| ≥8                                         | 2                              | 7                 | 18                   |
| <b>Clinical Stage</b>                      |                                |                   | #                    |
| <T2A                                       | 0                              | 13                | 59                   |
| ≥T2A                                       | 4                              | 6                 | 41                   |
| <b>Metastasis</b>                          | 0                              | 4                 | 18 <sup>#</sup>      |
| <b>Adjacent Benign Prostate Tissue</b>     | 5                              | 20                | 25                   |

<sup>#</sup>Some patients had missing data for some clinical feature.
