# Supplementary material for: Global analysis of the differentially expressed miRNAs of prostate cancer in Chinese patients
Source: PubMed Central journal article supplement (PMC4008360; doi:10.1186/1471-2164-14-757), 2013-11-05
Supplement: 1471-2164-14-757-S5.pdf [file 1471-2164-14-757-S5.pdf]

**Table S5. Comparison differentially expressed miRNAs in Chinese Pca patients with non-Chinese Pca patients**

| Systematic Name  | Our data | Taylor data | Schaefer data | Lin Data |
|------------------|----------|-------------|---------------|----------|
| hsa-miR-205      | down     | down        | down          | down     |
| hsa-miR-221      | down     | down        | down          | down     |
| hsa-miR-155      | down     | -           | -             | -        |
| hsa-miR-455-3p   | down     | down        | -             | down     |
| hsa-miR-193a-5p  | down     | -           | -             | -        |
| hsa-miR-222      | down     | down        | down          | down     |
| hsa-miR-221-5p   | down     | down        | -             | -        |
| hsa-miR-200b-5p  | down     | -           | -             | -        |
| hsa-miR-335      | down     | -           | -             | -        |
| hsa-miR-224      | down     | down        | -             | -        |
| hsa-miR-505      | down     | down        | -             | -        |
| hsa-miR-23b      | down     | down        | -             | -        |
| hsa-miR-374b     | down     | -           | -             | -        |
| hsa-miR-30c      | down     | down        | -             | -        |
| hsa-miR-26b      | down     | -           | -             | -        |
| hsa-miR-181d     | down     | -           | -             | -        |
| hsa-miR-374a     | down     | -           | -             | -        |
| hcmv-miR-UL70-3p | up       | up          | -             | -        |
| hsa-miR-1224-5p  | up       | -           | -             | up       |
| hsa-miR-939      | up       | -           | -             | -        |
| hsa-miR-1225-5p  | up       | up          | -             | -        |
| hsa-miR-188-5p   | up       | -           | -             | -        |
| hsa-miR-1249     | up       | -           | -             | -        |
| hsa-miR-663      | up       | up          | -             | -        |
| hsa-miR-574-5p   | up       | -           | -             | -        |
| hsa-miR-19a      | up       | -           | -             | -        |
| kshv-miR-K12-3   | up       | -           | -             | -        |
| hsa-miR-1915     | up       | -           | -             | -        |
